# Supplementary material
Source: PubMed Central journal article supplement (PMC8801847)
Supplement: SMJ-62-340.pdf [file SMJ-62-340.pdf]

## SINGAPORE MEDICAL COUNCIL CATEGORY 3B CME PROGRAMME

(Code SMJ 202107B)

**Question 1.** Regarding the line of Klein:

- (a) It runs along the superior margin of the femoral neck and traverses the lateral portion of the femoral head epiphysis.
- (b) It runs along the inferior margin of the femoral neck traverses the medial portion of the femoral head epiphysis.
- (c) It is useful in detecting slipped upper femoral epiphysis.
- (d) It is useful in detecting a fracture in an elderly patient.

True      False

- |                          |                          |
|--------------------------|--------------------------|
| <input type="checkbox"/> | <input type="checkbox"/> |

**Question 2.** Risk factors for slipped upper femoral epiphysis include:

- (a) Obesity.
- (b) Hypothyroidism.
- (c) Hyperparathyroidism.
- (d) Renal osteodystrophy.

- |                          |                          |
|--------------------------|--------------------------|
| <input type="checkbox"/> | <input type="checkbox"/> |

**Question 3.** Based on the Hilgenreiner and Perkin's lines, the upper femoral epiphysis should be in the:

- (a) Superolateral quadrant.
- (b) Superomedial quadrant.
- (c) Inferolateral quadrant.
- (d) Inferomedial quadrant.

- |                          |                          |
|--------------------------|--------------------------|
| <input type="checkbox"/> | <input type="checkbox"/> |

**Question 4.** Regarding the Shenton arc or line:

- (a) It runs along the inferior border of the superior pubic ramus and inferomedial border of the femoral neck.
- (b) It runs along the superior border of the superior pubic ramus and the inferomedial border of the femoral neck.
- (c) Interruption indicates femoral neck fracture.
- (d) Interruption indicates developmental dysplasia of the hip.

- |                          |                          |
|--------------------------|--------------------------|
| <input type="checkbox"/> | <input type="checkbox"/> |

**Question 5.** Regarding pelvic lines:

- (a) The iliopectineal line delineates the pelvic anterior column.
- (b) The iliopectineal line extends from the iliac wing medial margin, along the superior margin of the superior pubic ramus to the pubis symphysis.
- (c) The ilioischial line delineates the pelvic anterior column.
- (d) The ilioischial line starts from the iliac wing medial margin and extends to the ischial tuberosity.

- |                          |                          |
|--------------------------|--------------------------|
| <input type="checkbox"/> | <input type="checkbox"/> |

### Doctor's particulars:

Name in full: \_\_\_\_\_ MCR no.: \_\_\_\_\_  
 Specialty: \_\_\_\_\_ Email: \_\_\_\_\_

#### SUBMISSION INSTRUCTIONS:

Visit the SMJ website: <http://www.smj.org.sg/current-issue> and select the appropriate quiz. You will be redirected to the SMA login page.

**For SMA member:** (1) Log in with your username and password (if you do not know your password, please click on 'Forgot your password?'). (2) Select your answers for each quiz and click 'Submit'.

**For non-SMA member:** (1) Create an SMJ CME account, or log in with your SMJ CME username and password (for returning users). (2) Make payment of SGD 21.40 (inclusive of 7% GST) via PayPal to access this month's quizzes. (3) Select your answers for each quiz and click 'Submit'.

#### RESULTS:

(1) Answers will be published online in the SMJ September 2021 issue. (2) The MCR numbers of successful candidates will be posted online at the SMJ website by 21 September 2021. (3) Passing mark is 60%. No mark will be deducted for incorrect answers. (4) The SMJ editorial office will submit the list of successful candidates to the Singapore Medical Council. (5) One CME point is awarded for successful candidates. (6) SMC credits CME points according to the month of publication of the CME article (i.e. points awarded for a quiz published in the July 2021 issue will be credited for the month of July 2021, even if the deadline is in September 2021).

**Deadline for submission (July 2021 SMJ 3B CME programme): 12 noon, 14 September 2021.**
